# Supplementary material for: Topological structural transformation of a two-dimensional coordination polymer via single-crystal to single-crystal photoreaction
Source: Royal Society of Chemistry journal article supplement (doi:10.1039/d2dt03063b), 2022-01-01
Supplement: d2dt03063b1.pdf [file d2dt03063b1.pdf]

## Electronic Supplementary Information (ESI<sup>†</sup>)

### Topological structural transformation of a two-dimensional coordination polymer *via* single-crystal to single-crystal photoreaction

Ni-Ya Li,<sup>a</sup> Xin-Yu Guo,<sup>a</sup> Lei-Lei Liu,<sup>\*b</sup> Jian Ma<sup>a</sup> and Dong Liu<sup>\*a</sup>

---

<sup>a</sup> *Jiangsu Key Laboratory for Chemistry of Low-Dimensional Materials, School of Chemistry and Chemical Engineering, Huaiyin Normal University, Huaian 223300, Jiangsu, P. R. China. E-mail: dongliu@hytc.edu.cn*

<sup>b</sup> *School of Environment and Material Engineering, Yantai University, 30 Qingquan Road, Yantai 264005, Shandong, P. R. China. E-mail: liuleileimail@163.com*

## Table of Contents

|                                                                                                              |    |
|--------------------------------------------------------------------------------------------------------------|----|
| <b>Table S1</b> Selected Bond Lengths (Å) and Angles (°) for <b>1</b> and <b>1a</b> .....                    | S3 |
| <b>Fig. S1</b> Interrelated structure for <b>1</b> .....                                                     | S5 |
| <b>Fig. S2</b> PXRD patterns of <b>1</b> and <b>1a</b> .....                                                 | S6 |
| <b>Fig. S3.</b> The <sup>1</sup> H NMR spectra of <b>1a</b> (sunlight-irradiated sample of <b>1</b> ). ..... | S7 |
| <b>Fig. S4</b> Interrelated structure for <b>1a</b> .....                                                    | S8 |
| <b>Fig. S4</b> The TGA curves for <b>1</b> and <b>1a</b> .....                                               | S9 |

**Table S1** Selected Bond Lengths (Å) and Angles (°) for **1** and **1a**

---

| Compound <b>1</b>  |            |                   |           |
|--------------------|------------|-------------------|-----------|
| Cd(1)-O(1A)        | 2.297(2)   | Cd(1)-N(2B)       | 2.301(3)  |
| Cd(1)-N(1)         | 2.359(3)   | Cd(1)-O(1)        | 2.375(2)  |
| Cd(1)-O(3)         | 2.417(3)   | Cd(1)-O(3C)       | 2.467(3)  |
| Cd(1)-O(4C)        | 2.533(3)   |                   |           |
| O(1A)-Cd(1)-N(2B)  | 98.66(10)  | O(1A)-Cd(1)-N(1)  | 84.25(10) |
| N(2B)-Cd(1)-N(1)   | 177.09(10) | O(1A)-Cd(1)-O(1)  | 76.58(9)  |
| N(2B)-Cd(1)-O(1)   | 88.09(10)  | N(1)-Cd(1)-O(1)   | 92.67(10) |
| O(1A)-Cd(1)-O(3)   | 150.12(9)  | N(2B)-Cd(1)-O(3)  | 92.58(10) |
| N(1)-Cd(1)-O(3)    | 84.87(10)  | O(1)-Cd(1)-O(3)   | 76.23(8)  |
| O(1A)-Cd(1)-O(3C)  | 133.36(8)  | N(2B)-Cd(1)-O(3C) | 92.55(10) |
| N(1)-Cd(1)-O(3C)   | 85.37(10)  | O(1)-Cd(1)-O(3C)  | 149.31(8) |
| O(3)-Cd(1)-O(3C)   | 73.10(9)   | O(1A)-Cd(1)-O(4C) | 81.62(8)  |
| N(2B)-Cd(1)-O(4C)  | 95.49(10)  | N(1)-Cd(1)-O(4C)  | 84.84(10) |
| O(1)-Cd(1)-O(4C)   | 158.20(8)  | O(3)-Cd(1)-O(4C)  | 124.91(8) |
| O(3C)-Cd(1)-O(4C)  | 52.20(8)   |                   |           |
| Compound <b>1a</b> |            |                   |           |
| Cd(1)-O(1A)        | 2.321(4)   | Cd(1)-N(1)        | 2.321(5)  |
| Cd(1)-O(1)         | 2.364(4)   | Cd(1)-N(2B)       | 2.365(5)  |

|                   |            |                   |            |
|-------------------|------------|-------------------|------------|
| Cd(1)-O(3)        | 2.432(4)   | Cd(1)-O(4C)       | 2.455(5)   |
| Cd(1)-O(3C)       | 2.484(4)   |                   |            |
| O(1A)-Cd(1)-N(1)  | 102.48(16) | O(1A)-Cd(1)-O(1)  | 75.32(15)  |
| N(1)-Cd(1)-O(1)   | 88.48(16)  | O(1A)-Cd(1)-N(2B) | 83.45(16)  |
| N(1)-Cd(1)-N(2B)  | 173.85(17) | O(1)-Cd(1)-N(2B)  | 91.48(16)  |
| O(1A)-Cd(1)-O(3)  | 147.80(14) | N(1)-Cd(1)-O(3)   | 92.49(16)  |
| O(1)-Cd(1)-O(3)   | 76.78(14)  | N(2B)-Cd(1)-O(3)  | 81.51(16)  |
| O(1A)-Cd(1)-O(4C) | 82.71(14)  | N(1)-Cd(1)-O(4C)  | 99.35(17)  |
| O(1)-Cd(1)-O(4C)  | 157.82(14) | N(2B)-Cd(1)-O(4C) | 82.92(17)  |
| O(3)-Cd(1)-O(4C)  | 123.13(14) | O(1A)-Cd(1)-O(3C) | 135.15(14) |
| N(1)-Cd(1)-O(3C)  | 91.56(16)  | O(1)-Cd(1)-O(3C)  | 148.32(14) |
| N(2B)-Cd(1)-O(3C) | 85.25(16)  | O(3)-Cd(1)-O(3C)  | 71.56(16)  |
| O(4C)-Cd(1)-O(3C) | 52.84(14)  |                   |            |

---

Symmetry codes: for **1**: (A)  $-x + 1, -y + 1, -z + 1$ ; (B)  $x, y, z - 1$ ; (C)  $-x, -y + 1, -z + 1$ .

for **1a**: (A)  $-x + 2, -y + 1, -z + 1$ ; (B)  $x, y, z - 1$ ; (C)  $-x + 1, -y + 1, -z + 1$ .

(a)

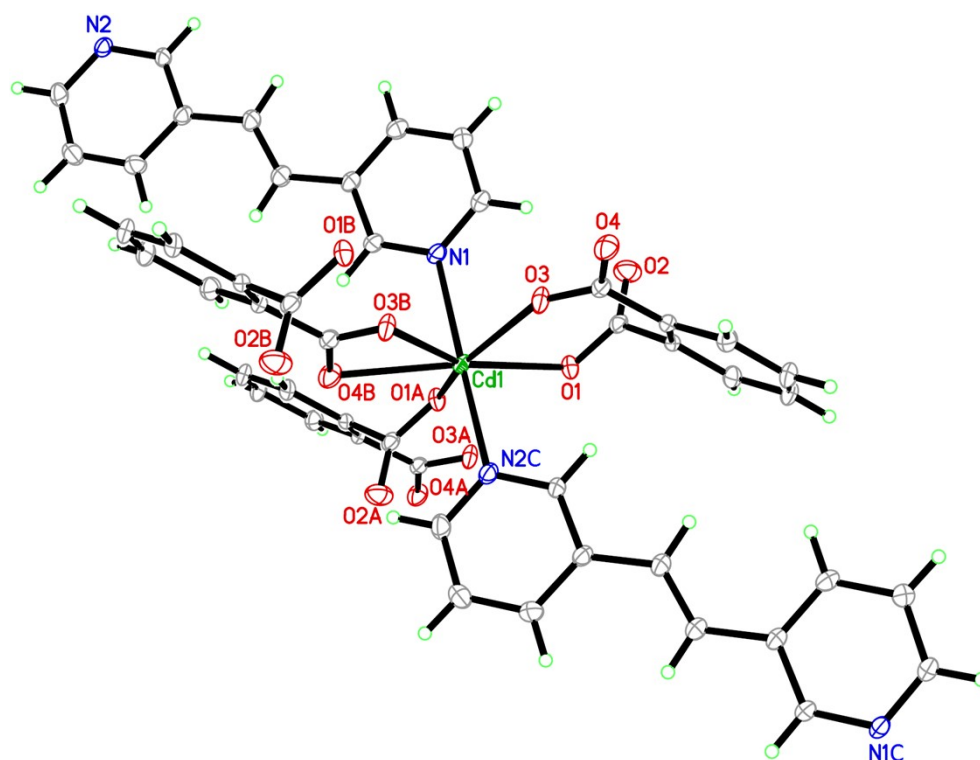

(b)

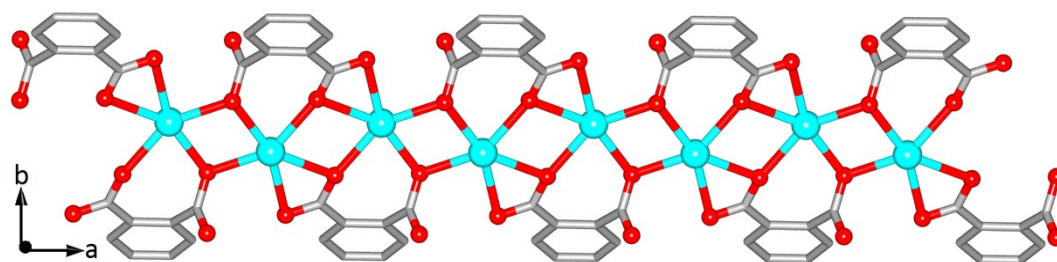

**Fig. S1.** (a) View of the coordination environment of Cd1 in **1** with labeling scheme. Symmetry codes: (A)  $-x + 1, -y + 1, -z + 1$ ; (B)  $-x, -y + 1, -z + 1$ ; (C)  $x, y, z - 1$ . (b) View of the 1D  $[\text{Cd}(\text{pha})]_n$  chain in **1** along the  $a$  axis.

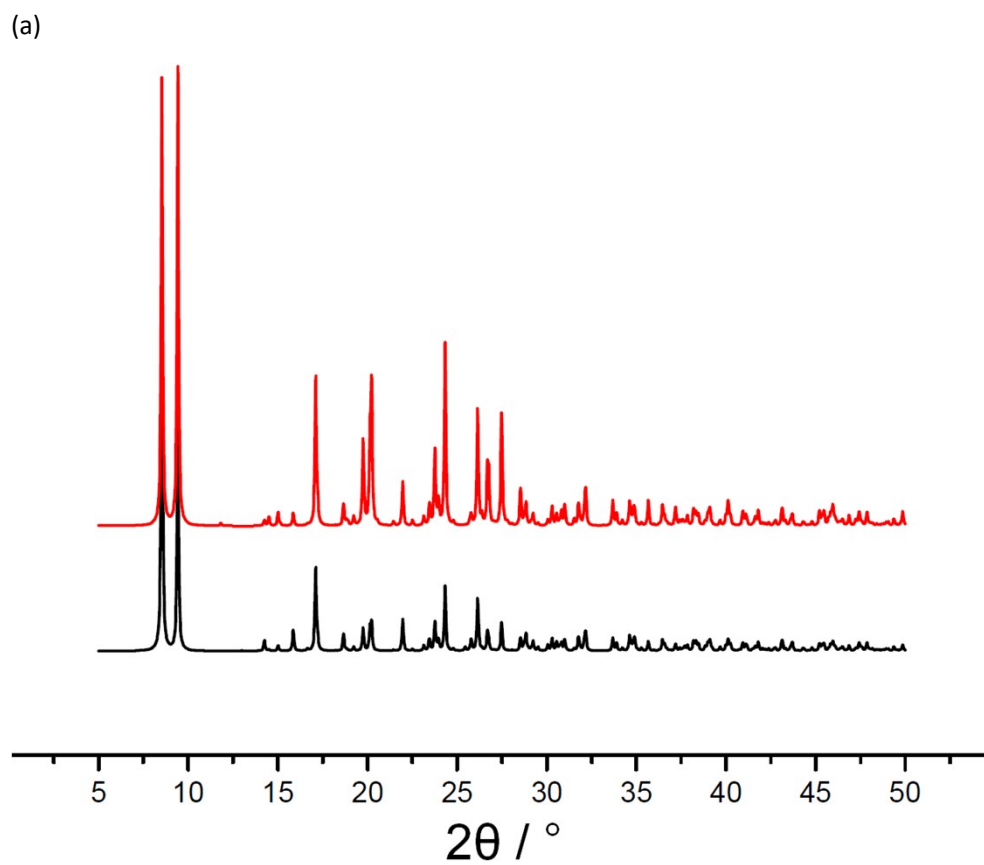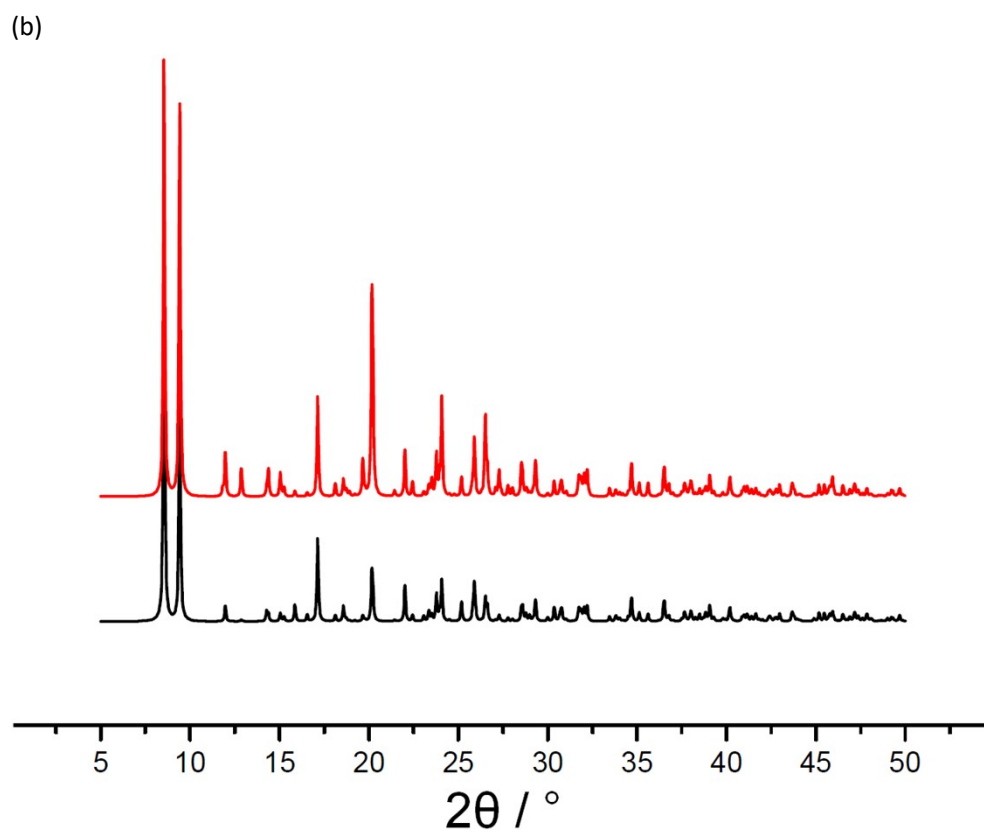

**Fig. S2.** PXRD patterns for **1** and **1a** (simulated pattern from single crystal: black; experimental pattern from grinding crystals: red).

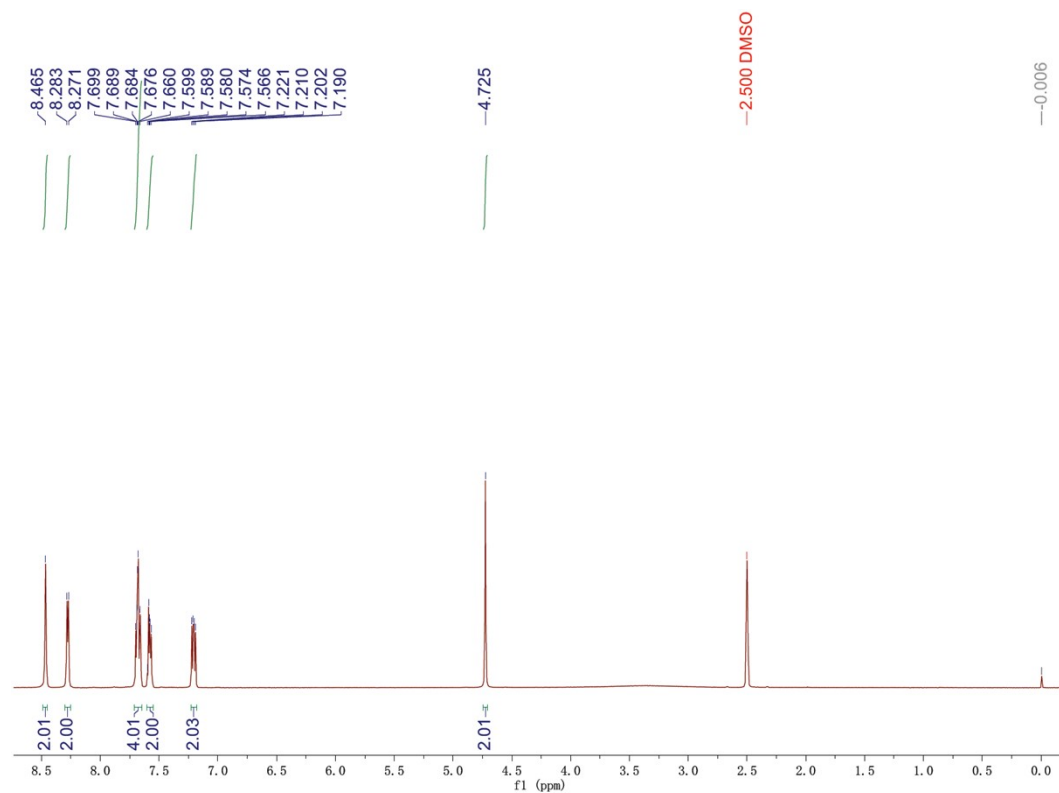

**Fig. S3.** The  $^1\text{H}$  NMR spectra of **1a** (sunlight-irradiated sample of **1**). Due to the low solubility of 2D coordination polymer, the sample was digested by  $12\text{ mol}\cdot\text{L}^{-1}$  HCl aqueous solution and dried in a vacuum oven at  $80\text{ }^\circ\text{C}$ . The obtained solid was then dissolved in  $0.6\text{ mL } d_6\text{-DMSO}$  for  $^1\text{H}$  NMR analysis.

(a)

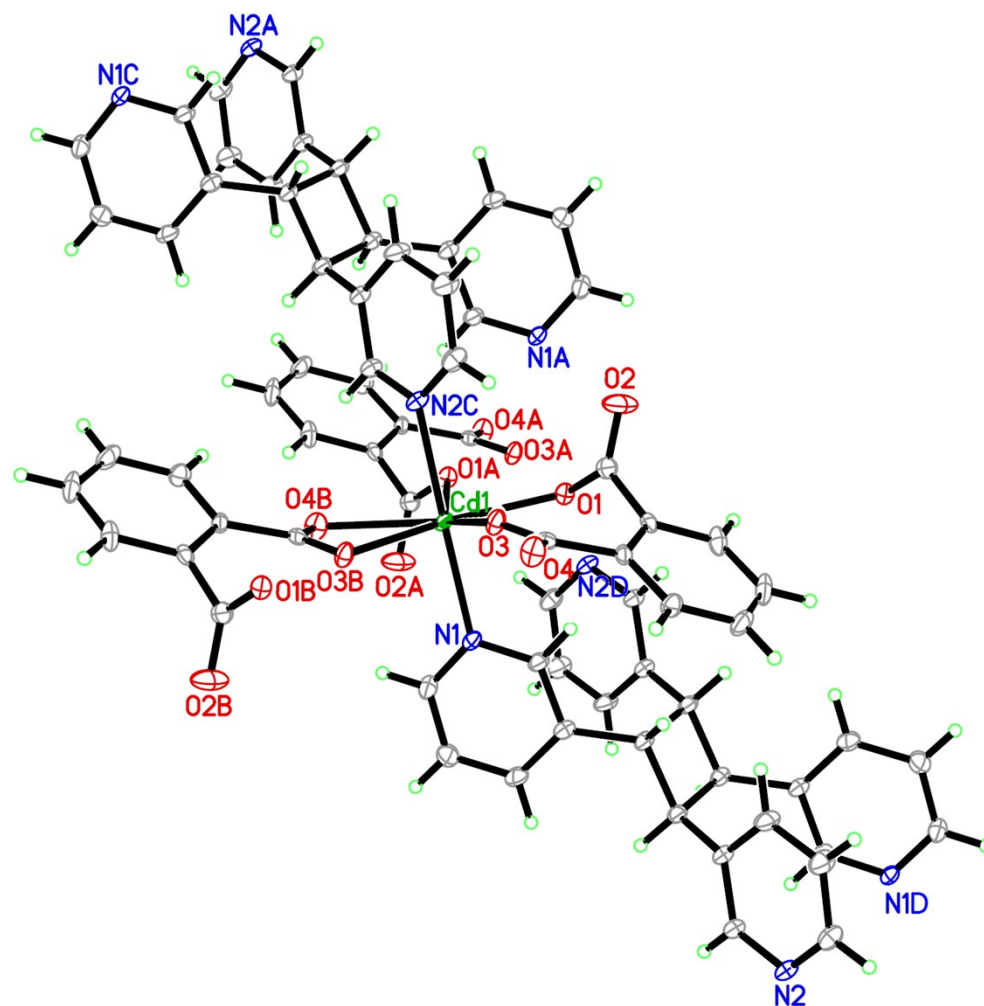

(b)

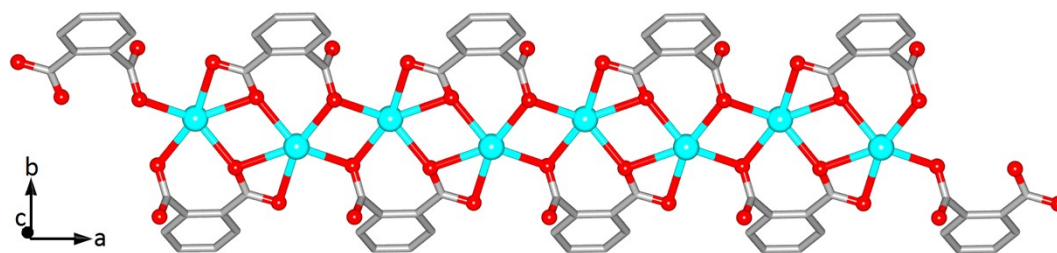

**Fig. S4.** (a) View of the coordination environment of Cd1 in **1a** with labeling scheme.

Symmetry codes: (A)  $-x + 2, -y + 1, -z + 1$ ; (B)  $-x + 1, -y + 1, -z + 1$ ; (C)  $x, y, z - 1$ ; (D)  $-$

$x + 2, -y + 1, -z + 2$ . (b) View of the 1D  $[\text{Cd}(\text{pha})]_n$  chain in **1a** along the  $a$  axis.



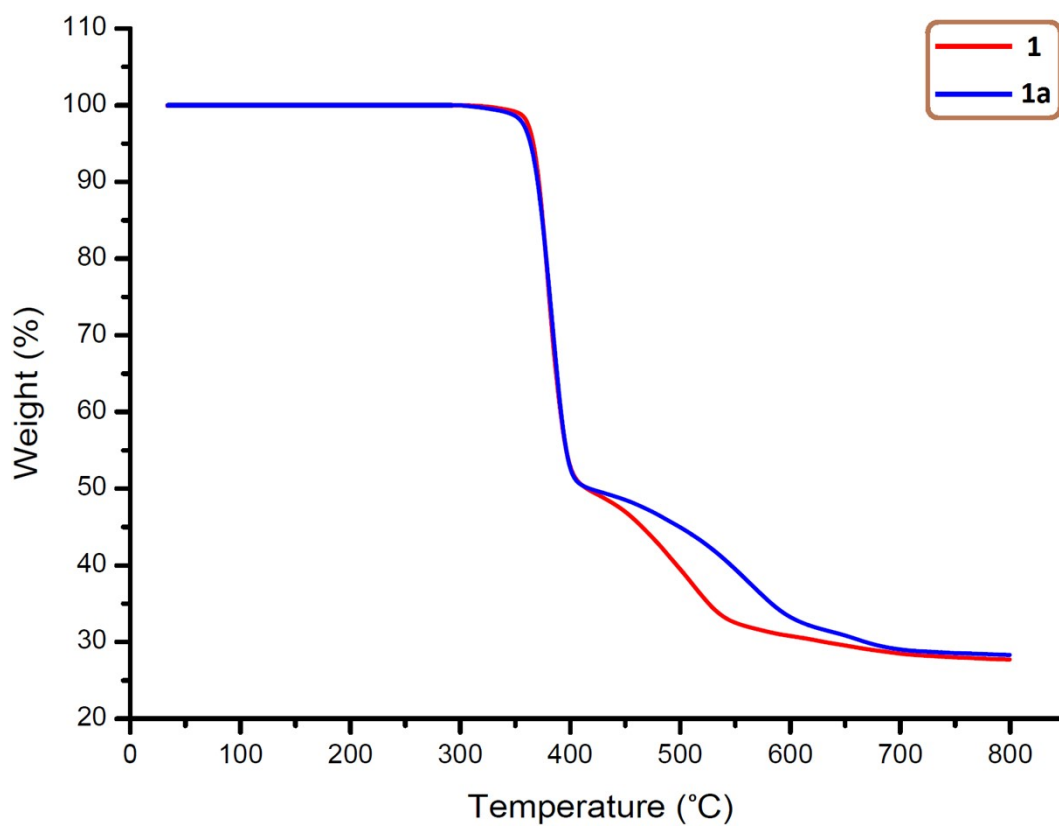

**Fig. S5.** The TGA curves for **1** and **1a**.
